# Supplementary material for: LINC01094/SPI1/CCL7 Axis Promotes Macrophage Accumulation in Lung Adenocarcinoma and Tumor Cell Dissemination
Source: Hindawi journal article supplement (doi:10.1155/2022/6450721), 2022-09-09

2B

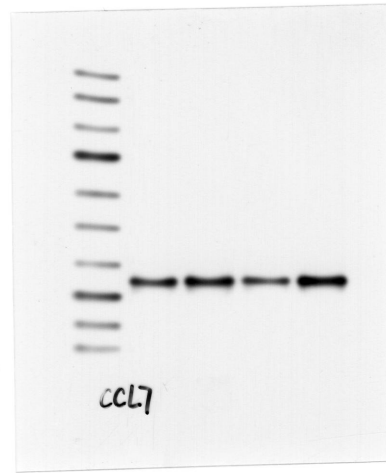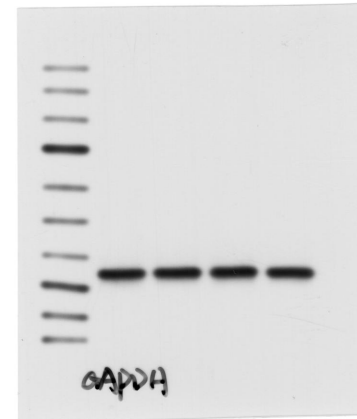

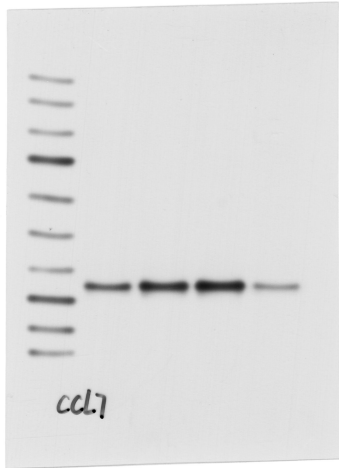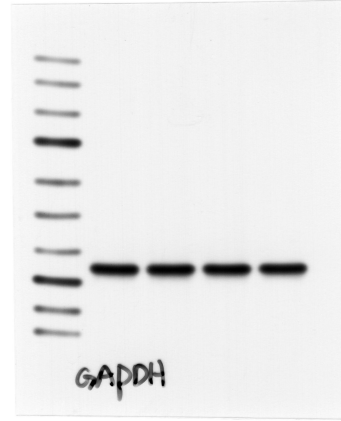

2F

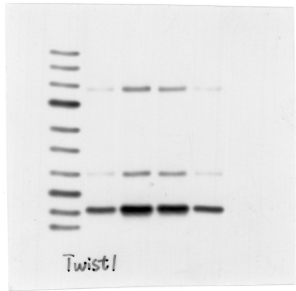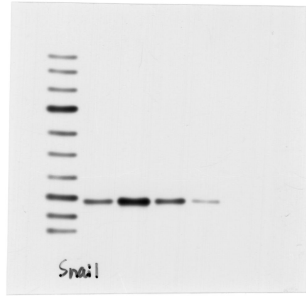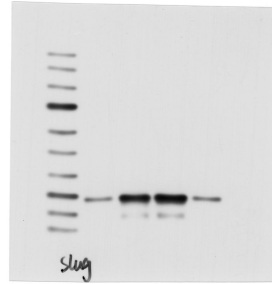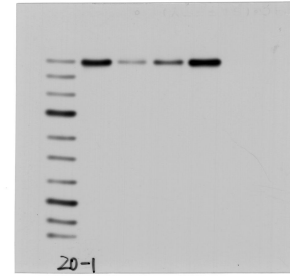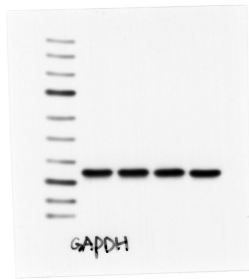

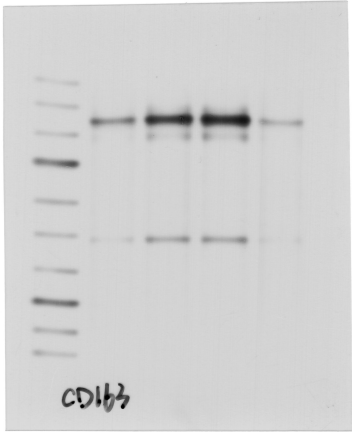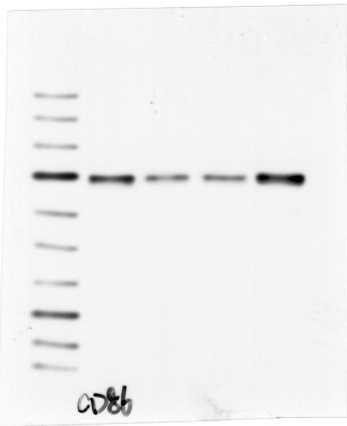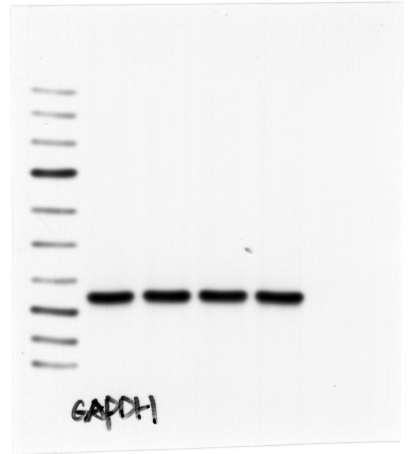

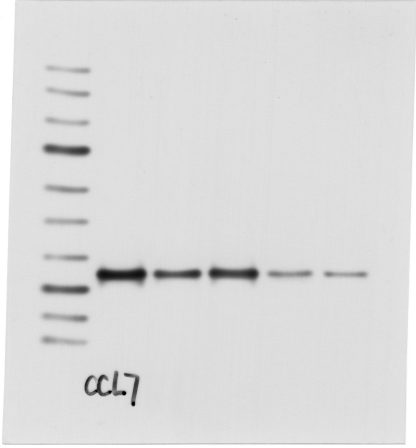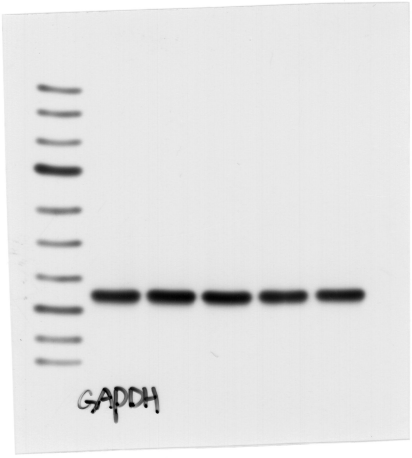

6B

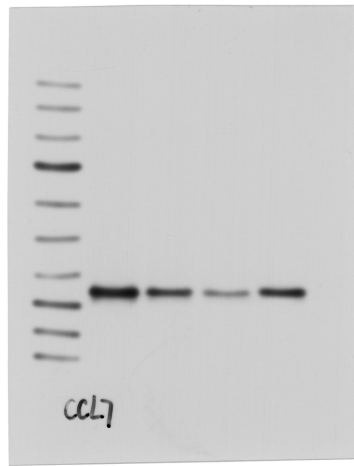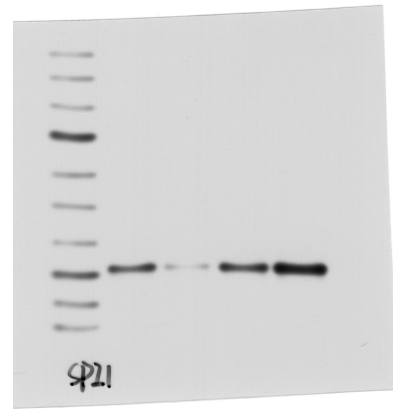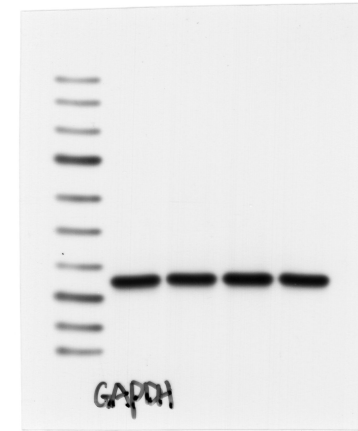

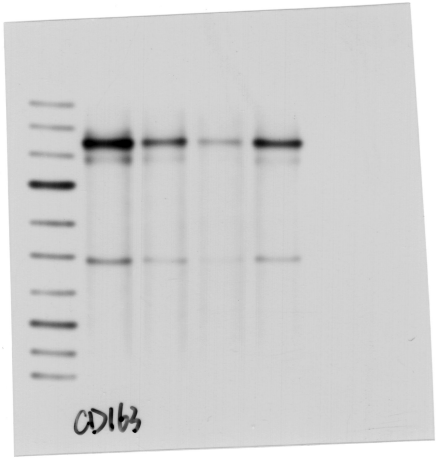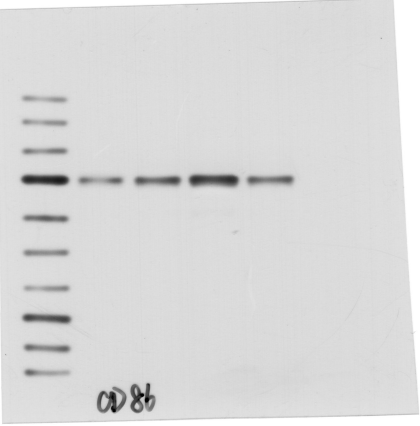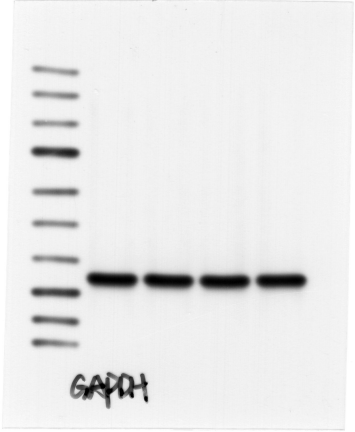

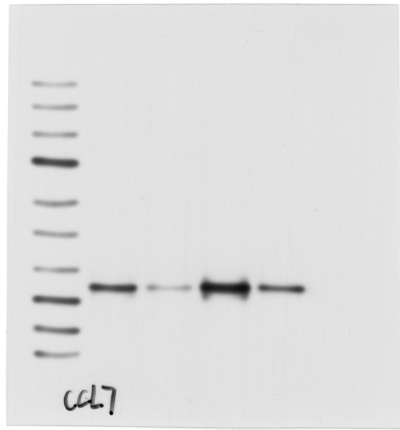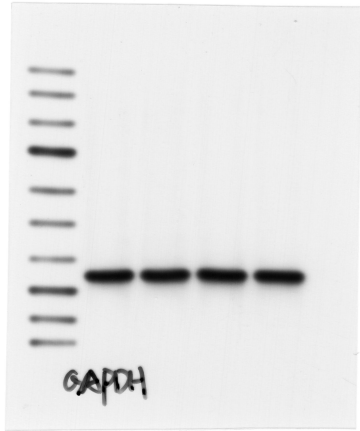

Supplement: f1 [file 6450721.f1.pdf]
